# Supplementary material for: Feedback control of growth, differentiation, and morphogenesis of pancreatic endocrine progenitors in an epithelial plexus niche
Source: PubMed Central journal article supplement — Genes Dev. 2015 Oct 15;29(20):2203–16. doi: 10.1101/gad.267914.115 (PMC4617982; doi:10.1101/gad.267914.115), 2015-10-15
Supplement: supp_29.20.2203_SuppMaterial.pdf [file supp_29.20.2203_SuppMaterial.pdf]

## Supplemental Figure Legends

**Supplementary Figure 1.** Formation of core-duct and DB states during late gestation. (A,B) Plexus-to-duct transformation (from Fig. 2I,L) showing plexus (blue dashed line in A) connected to duct (yellow dashed line in B). Sox9 in plexus and duct-states (C is sectional inset from B). (D,E) Analysis of nuclear position and shape in plexus versus core duct states. (F) Quantification of mean fluorescence intensities in Sox9<sup>+</sup> populations from plexus and duct states at E17.5 (G,J) Epifluorescence images of 30-40  $\mu\text{m}$ -thick cryosections showing central (red dashed line) and interlobular ducts (green dashed line) at E17.5. (H,I,K,L) Fluorescence detection of DBA<sup>+</sup>, Muc1<sup>+</sup>, and CK19<sup>+</sup> epithelium at 40x magnification in  $\sim 35 \mu\text{m}$  confocal z-stacks. DBA marks the central (yellow arrow), interlobular (yellow arrowhead), and intralobular ducts (blue arrow). (L) CK19 marks the same, in addition to DBA<sup>-</sup> intercalating ducts (blue arrowhead). Scale bars are 15  $\mu\text{m}$  in A-C, 100  $\mu\text{m}$  in G,K; 20  $\mu\text{m}$  in H,I,K,L.

**Supplementary Figure 2.** Dynamics of plexus-to-duct transformation in the core. Measurement of relative pixel area for Muc1<sup>+</sup> plexus over the combined plexus and duct-state pixel area in the core. Measurements were taken from serial 30-40  $\mu\text{m}$  thick sections covering whole dorsal pancreata. Measurements exclude Muc1<sup>+</sup> ductal branches and pro-acinar tips. Measurements were taken using ImageJ software. Error bars are S.E.M, n = 3 for each time point.

**Supplementary Figure 3.** The Ngn3 to Sox9 ratio indicates the balance between endocrine differentiation and progenitor maintenance. (A) Lineage diagram showing the progression, from replicating Sox9<sup>+</sup> progenitor status, through sequential Ngn3<sup>+</sup> states during endocrine-lineage commitment. Ngn3 and Sox9 co-expression in the epithelium (Sox9<sup>+</sup>Ngn3<sup>+</sup>) defines the initial Ngn3<sup>+</sup> state, followed by high levels of Ngn3 during delamination (Sox9<sup>-</sup>Ngn3<sup>Hi</sup>), and finally Ngn3 down-regulation (Sox9<sup>-</sup>Ngn3<sup>Lo</sup>) in committed endocrine cells. (B-D) Derivation of endocrine yield, a quantitative descriptor of endocrine-lineage flux from the epithelium, based on a measured ratio of

Ngn3<sup>+</sup> and Sox9<sup>+</sup> cell states. (B) Theoretical segment of the trunk-epithelium with a representative distribution of Sox9<sup>+</sup> and Ngn3<sup>+</sup> cell states. (C) The Ngn3:Sox9 ratio observed at a given sampling time is determined by the temporal relationship between the Sox9<sup>+</sup> cell-cycle period (growth parameter) and the duration of the Ngn3-positive period of endocrine commitment (differentiation parameter). (D) Provided comparable time-frames for these two parameters, endocrine yield can be determined by converting the Ngn3:Sox9 ratio into a fractional representation reflecting the number of cells maintaining replicative Sox9<sup>+</sup> cell status, versus differentiating Ngn3<sup>+</sup> status, in a defined epithelial segment at a given time.

**Supplementary Table 1.** Absolute numbers of Sox9<sup>+</sup> mitotic figures and Ngn3<sup>+</sup> cells states evaluated at each time point during EdU pulse-chase time-course analyses. “n” indicates the number of pancreata sampled for each time point.

**Supplementary Figure 4.** Ngn3 is down-regulated before acquisition of Pdx1<sup>Hi</sup> status. (A-F) Immunodetection of Ngn3 and Pdx1 in cryosections at indicated stages. The vast majority of Ngn3<sup>+</sup> cells co-express low levels of Pdx1 (white arrowheads). Low levels of Pdx1 are also observed in the Ngn3<sup>+</sup> epithelium (yellow arrowheads in C,F). Pdx1<sup>Hi</sup> cells do not co-express Ngn3 (blue arrowheads). Scale bars are 20 μm.

**Supplementary Figure 5.** New Ngn3<sup>+</sup> cells are generated throughout 2<sup>o</sup> transition. Proportion of the total Ngn3<sup>+</sup> population that is positive for Sox9 (early Ngn3<sup>+</sup>Sox9<sup>+</sup> cell state) at indicated stages. Error bars are S.E.M for n = 3 pancreata at each stage, 30% of total pancreas scored. No statistical difference was detected at any stage (p = 0.5912, one-way Anova).

**Supplementary Figure 6.** Ngn3<sup>+</sup> and Sox9<sup>+</sup> immune-detection indicates robust endocrine differentiation throughout the 2<sup>o</sup> transition. (A-L) Representative images of Sox9<sup>+</sup> and Ngn3<sup>+</sup> populations at stages

indicated. Later stage (E16-17.5) images focus on epithelium where  $\text{Ngn3}^+$  cells are being born in large numbers. Scale bars are 50  $\mu\text{m}$ .

**Supplementary Figure 7.**  $\text{Sox9}^+$  populations mark plexus, duct, and ductal-branch states. (A-F) Whole mount z-stack reconstructions of  $\text{Sox9}$  and  $\text{Muc1}$ -labeled epithelium in peripheral segments of wild-type dorsal pancreas at E14.5 and E17.5. Blue, red, and green boundaries demarcate plexus, duct, and ductal-branch states, respectively. (C,F) Pro-acinar tips are demarcated by intense  $\text{Muc1}$  signal, a bulb-like morphology that becomes clefted and elongated over time, and a low nuclear  $\text{Sox9}$  signal that diminishes over time. Scale bars are 20  $\mu\text{m}$ .

**Supplemental Figure 8.** Endocrine differentiation in the plexus-state persists late into  $2^0$  transition. (A-D)  $\text{Muc1}$ ,  $\text{Ngn3}$ , and  $\text{Sox9}$  whole-mount immunolabeling of core and peripheral regions of dorsal pancreas exhibiting plexus (blue dashed line), ductal-branch (green dashed line), and duct (red dashed line) states at E18.5. Note reduced  $\text{Sox9}$  levels in duct compared to plexus in *B*. Scale bars are 20  $\mu\text{m}$ .

**Supplementary Figure 9.** Epithelial  $\text{Hes1}$ -production is reduced under *Ngn3*-deficient conditions. (A-D) Frozen section analysis of the ratios of  $\text{Hes1}^+$  and  $\text{Sox9}^+$  populations in the trunk domain of control and *Ngn3*-deficient animals. (D) Blue arrowheads indicate clusters of  $\text{Hes1}^+$  cells in the  $\text{Ngn3}^{\text{EGFP/EGFP}}$  samples.

**Supplementary Figure 10.** S-phase indices in acinar cells are unchanged in *Ngn3*-deficient pancreata. (A) Representative 20x image of EdU incorporation at 1 hour post-injection in  $\text{amylase}^+$  acinar clusters of  $\text{Ngn3}^{\text{EGFP/+}}$  and  $\text{Ngn3}^{\text{EGFP/EGFP}}$  dorsal pancreas. (B) Quantification of the Edu-incorporation index. Scale bars are 50  $\mu\text{m}$ . Error bars are S.E.M.  $N = 1673 \text{Ngn3}^{\text{EGFP/+}}$  and  $N = 1436 \text{Ngn3}^{\text{EGFP/EGFP}}$   $\text{amylase}^+$  cells counted from five sections spanning  $n = 2$  dorsal pancreas for each genotype.

**Supplementary Figure 11.** Late-stage corrective remodeling in *Ngn3*-deficient epithelium.  $\text{Muc1}$  and insulin labeling in 40  $\mu\text{m}$  thick sections showing representative core (A-L) and peripheral (M & N) regions

of *Ngn3*<sup>EGFP/+</sup> and *Ngn3*<sup>EGFP/EGFP</sup> pancreata at stages indicated. Scale bars are 30  $\mu\text{m}$  in A,D,G-L; 20  $\mu\text{m}$  in B,E; 50  $\mu\text{m}$  in C,F; 100  $\mu\text{m}$  in M,N.

**Supplementary Figure 12.** Feedback control of endocrine progenitor growth, differentiation, and morphogenesis in the plexus niche. (A) Diagrammatic representation of the principle morphogenetic processes comprising trunk epithelial morphogenesis during 2<sup>o</sup> transition. Regions of the organ enriched for Notch-responsive endocrine progenitors are demarcated in blue, whereas regions reduced or absent in this respect are orange. Diagram intends to contrast the extremes of each morphological state and process, with only rough anatomical precision. (B) Diagrammatic representation of the local feedback interactions operating in the plexus-state.

**Supplementary Table 2.** Antibodies and Detection Methods.

**Supplementary Table 3.** Primers used for genotyping and qPCR analyses

Bankaitis\_Supp. Fig1

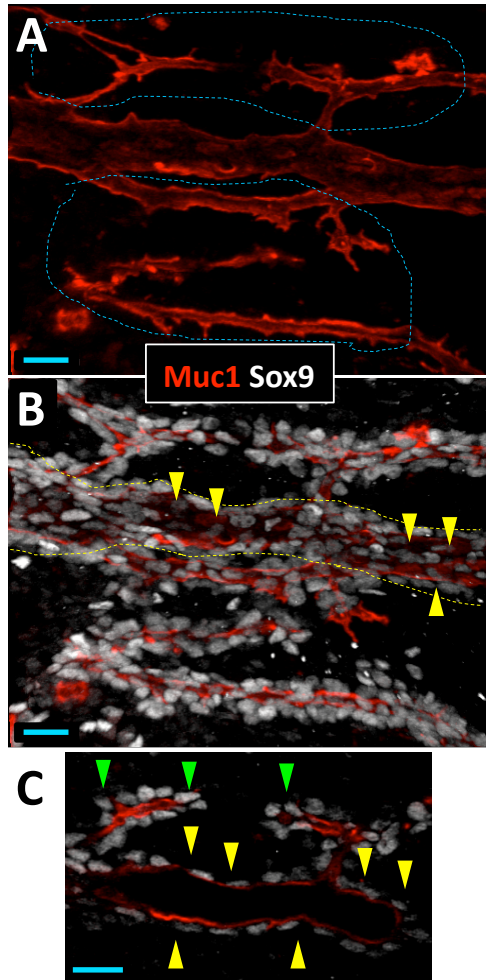

**D** Lumen to nuclear-apex distance

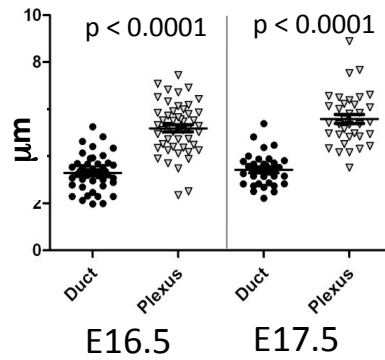

**E** Nuclear height/width

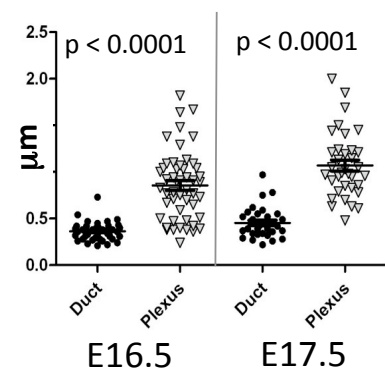

**F** Nuclear Sox9 intensity

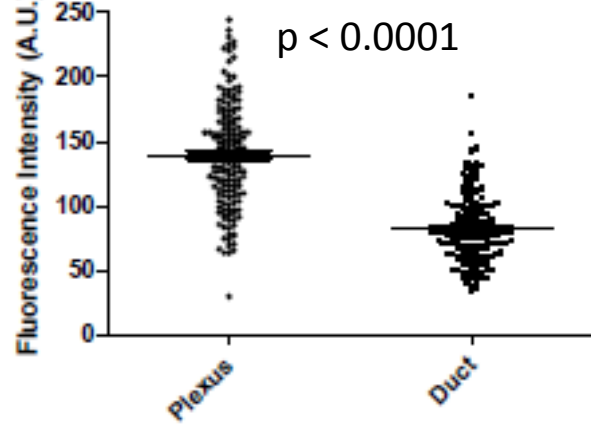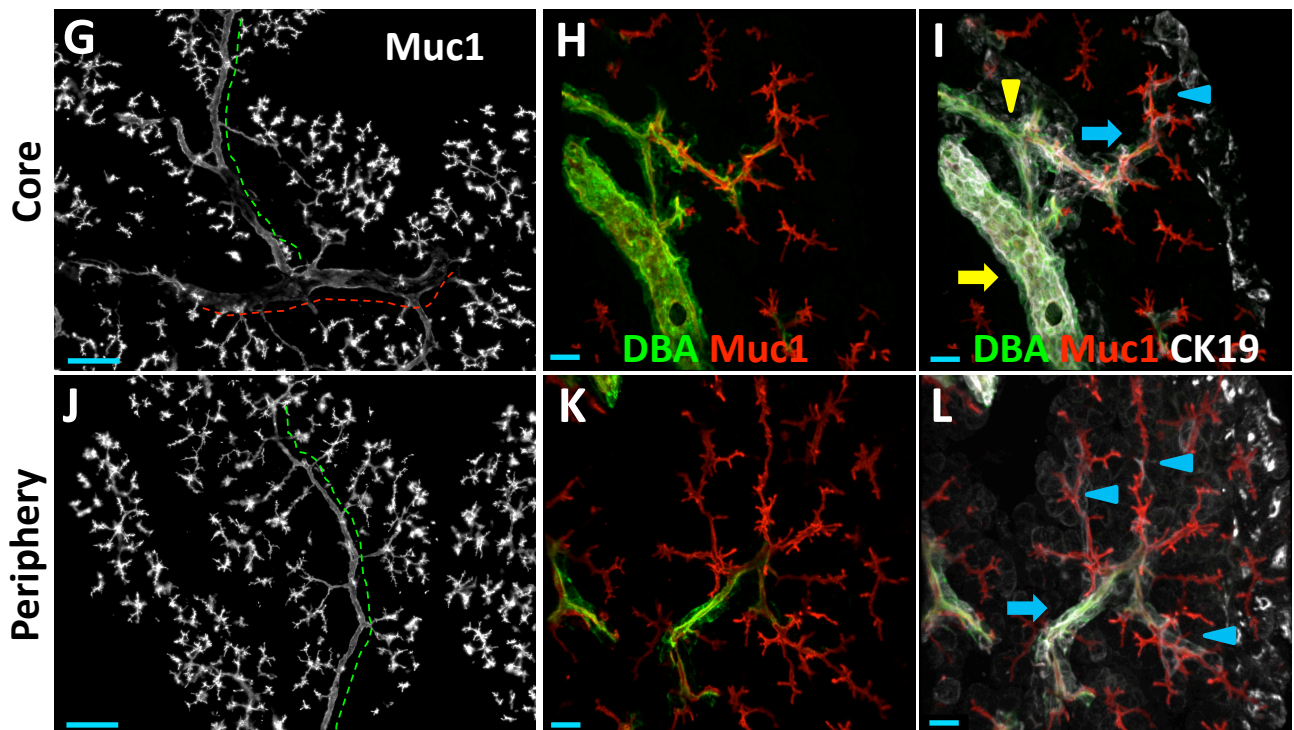

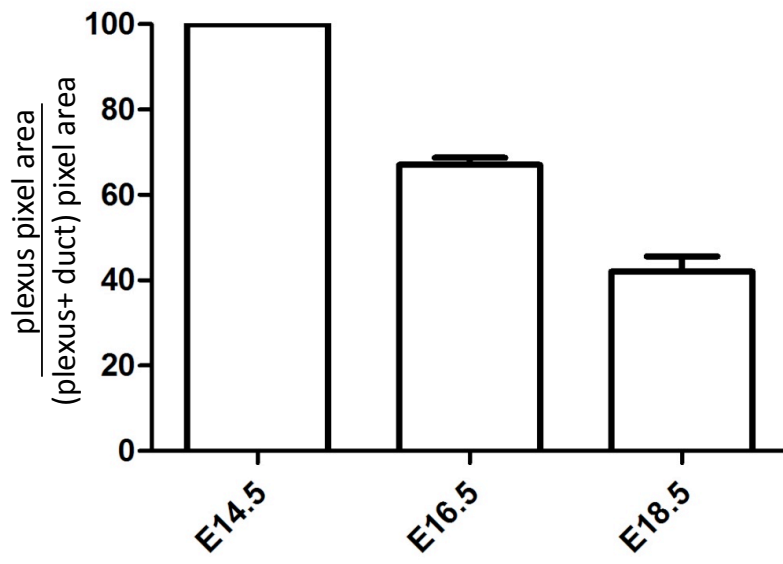

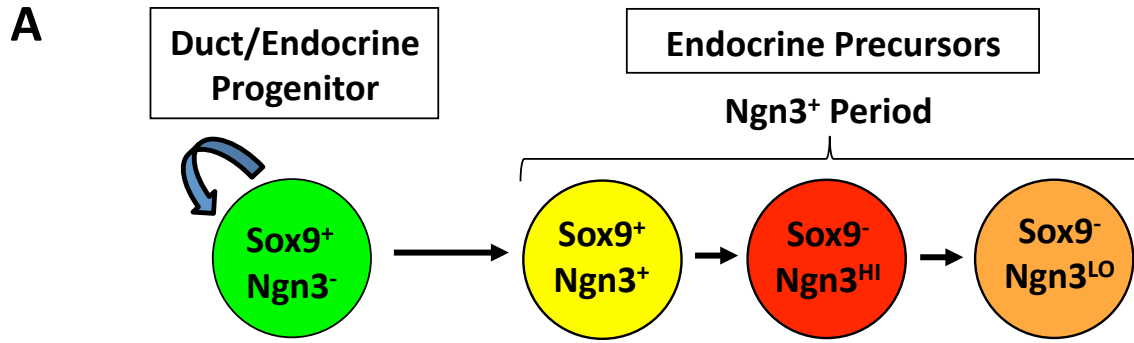

**B** Ngn3 to Sox9 Ratio

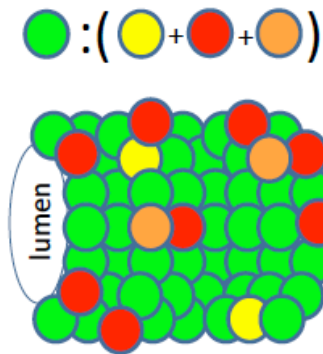

**C** Temporal Relationship

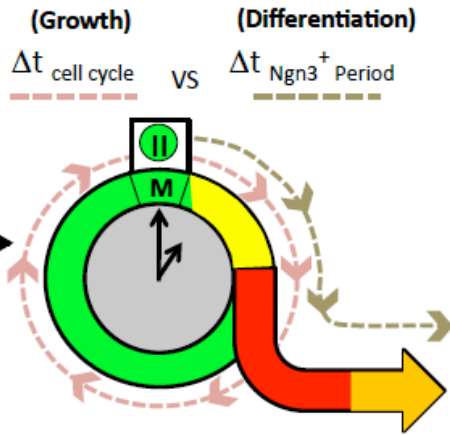

**D** Interpretation

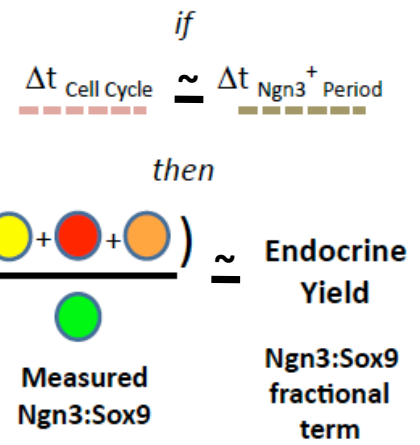

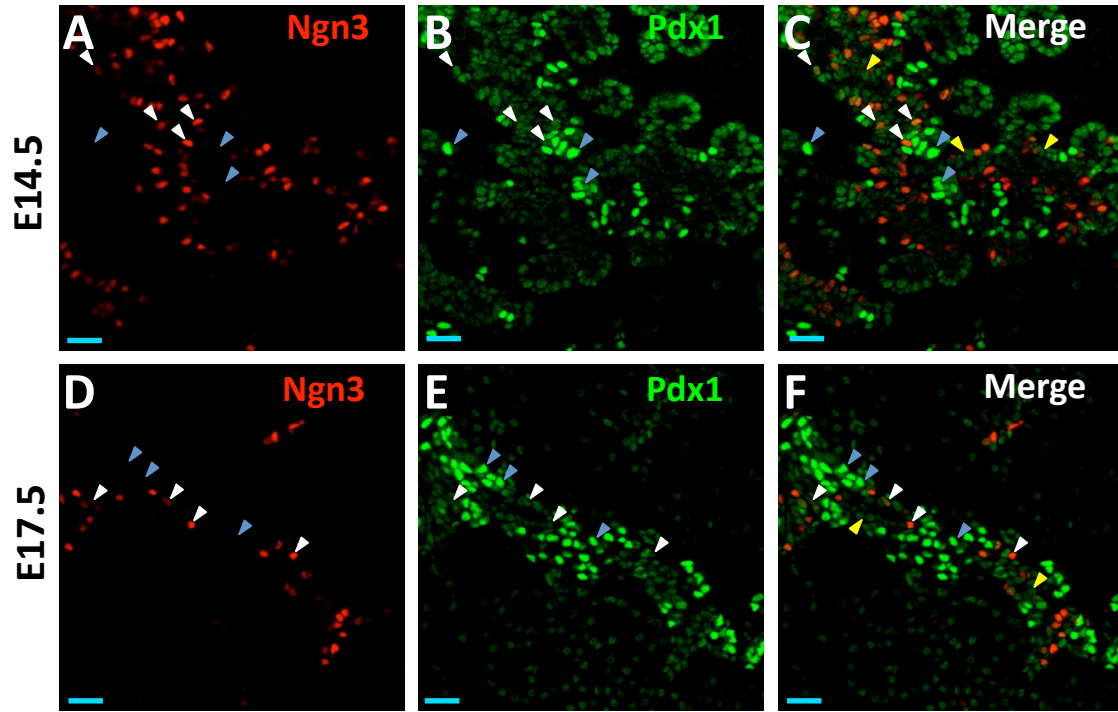



## Bankaitis\_Supp. Table1

|         | Sox9 <sup>+</sup> MF | Sox9 <sup>+</sup> Ngn3 <sup>LO</sup> | Sox9 <sup>-</sup> Ngn3 <sup>HI</sup> | Sox9 <sup>-</sup> Ngn3 <sup>LO</sup> |
|---------|----------------------|--------------------------------------|--------------------------------------|--------------------------------------|
| 1 hour  | 76 (n=3)             | 307 (n=3)                            | 462 (n=3)                            | 227 (n=3)                            |
| 2 hour  | 93 (n=3)             | 234 (n=3)                            | 402 (n=3)                            | 265 (n=3)                            |
| 3 hour  | 71 (n=3)             | 181 (n=2)                            | 259 (n=2)                            | 189 (n=2)                            |
| 6 hour  | 74 (n=3)             | 367 (n=3)                            | 404 (n=3)                            | 235 (n=3)                            |
| 8 hour  | 105 (n=3)            | 445 (n=3)                            | 469 (n=3)                            | 340 (n=3)                            |
| 10 hour | 186 (n=3)            | 197 (n=2)                            | 387 (n=3)                            | 328 (n=2)                            |
| 12 hour | 90 (n=3)             | 232 (n=3)                            | 452 (n=3)                            | 216 (n=3)                            |
| 13 hour | 55 (n=3)             | 391 (n=3)                            | 344 (n=3)                            | 244 (n=3)                            |
| 15 hour | 190 (n=3)            | 510 (n=3)                            | 719 (n=3)                            | 602 (n=3)                            |
| 17 hour | 142 (n=3)            | ND                                   | 535 (n=3)                            | 507 (n=3)                            |
| 19 hour | 69 (n=2)             | ND                                   | ND                                   | 78 (n=2)                             |
| 22 hour | 25 (n=3)             | ND                                   | ND                                   | 151 (n=3)                            |
| 24 hour | 62 (n=3)             | ND                                   | ND                                   | 247 (n=3)                            |

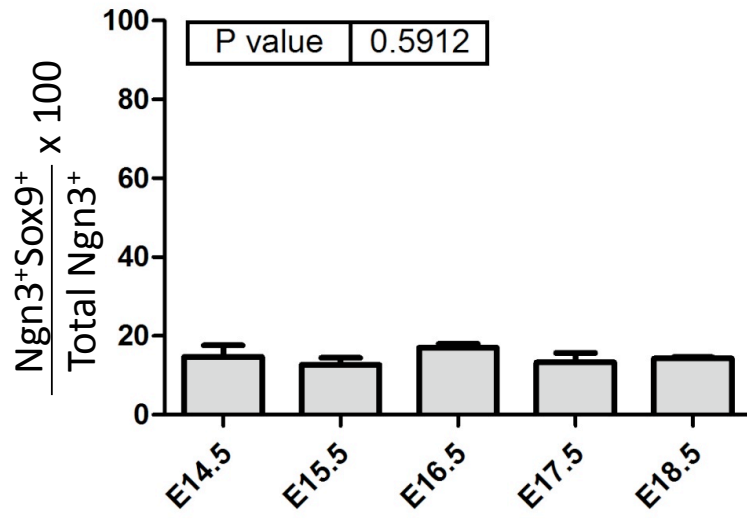

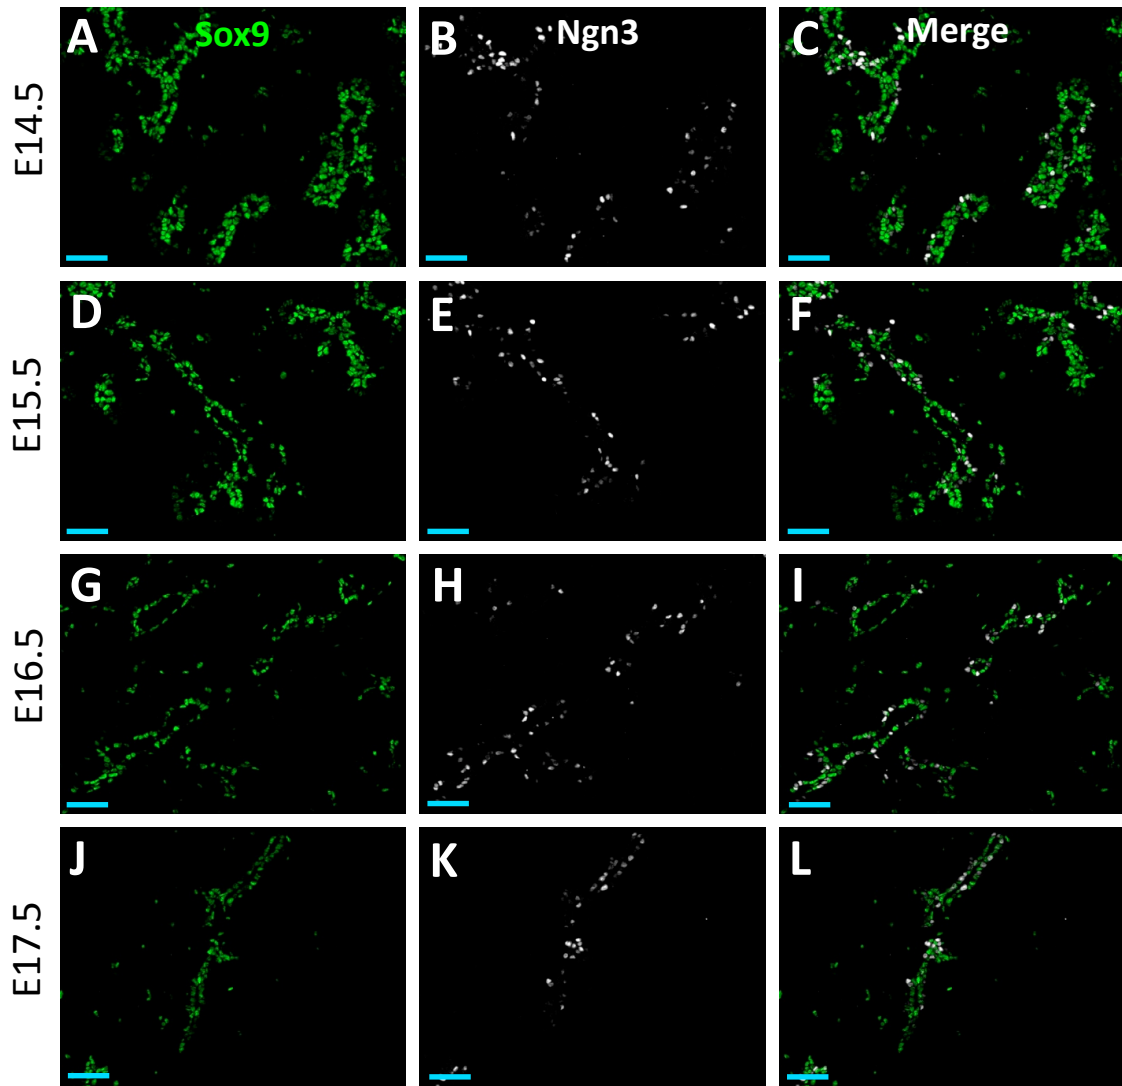

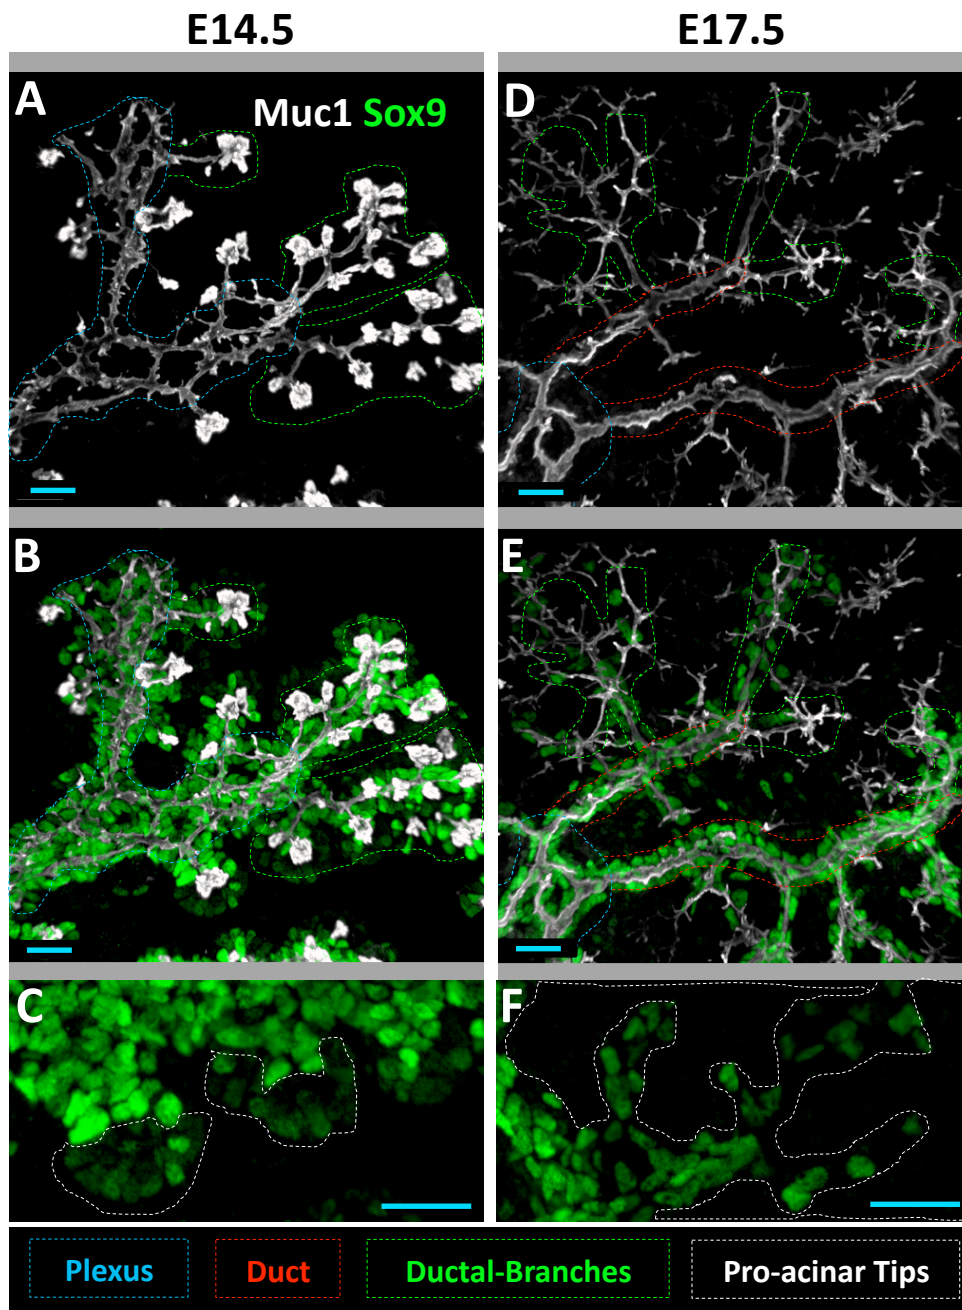

Core

Periphery

Muc1 Ngn3

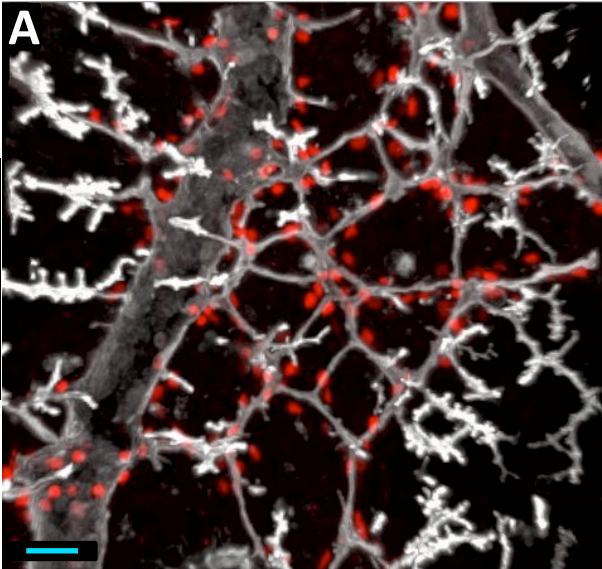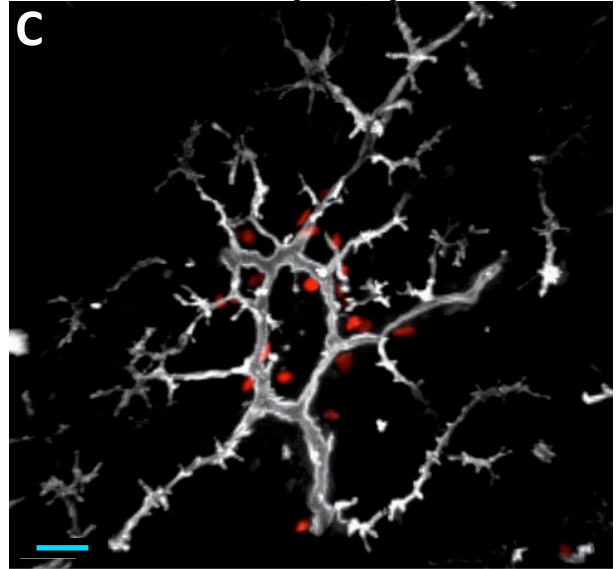

Muc1 Ngn3 Sox9

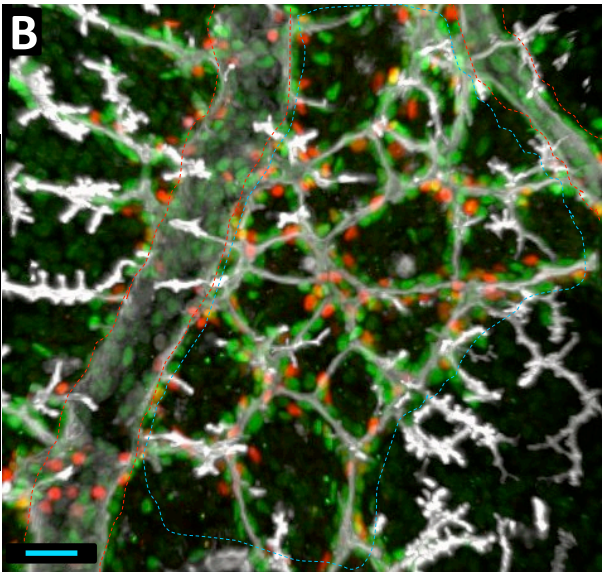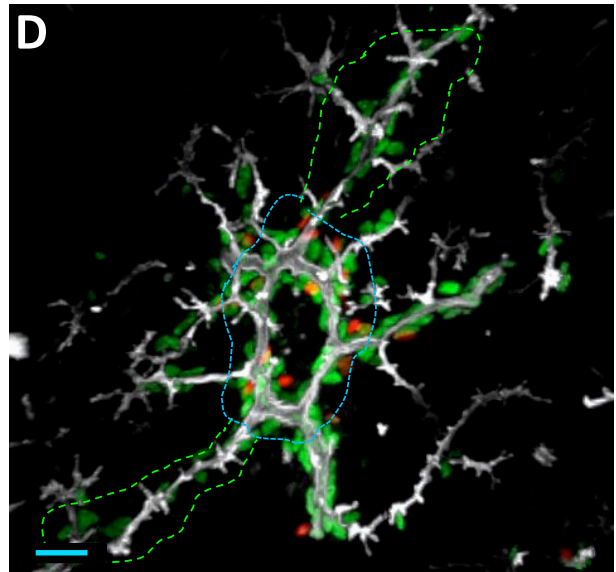

Plexus

Duct

Ductal-Branches

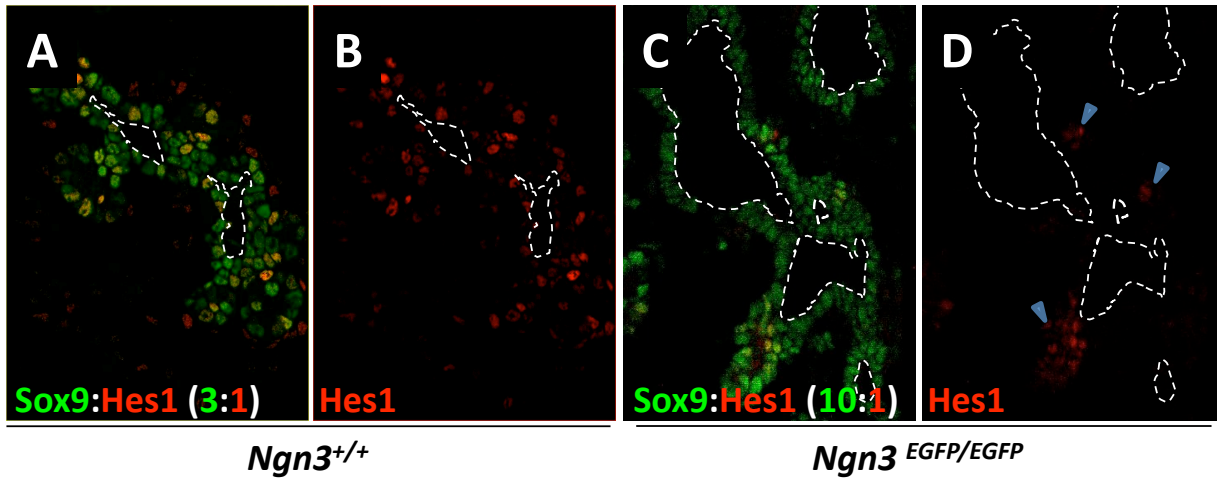

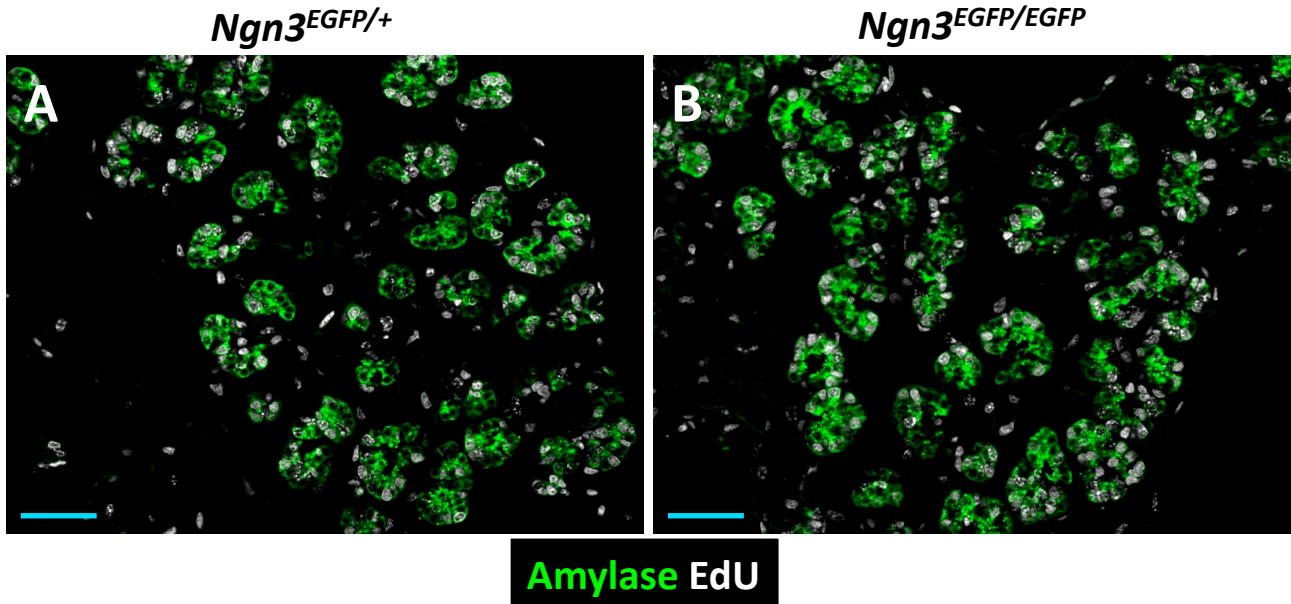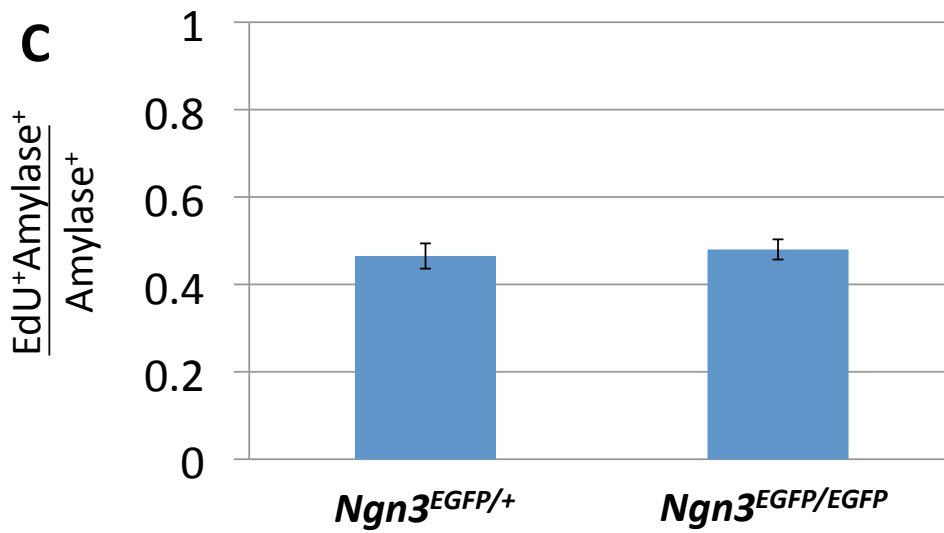

## Core

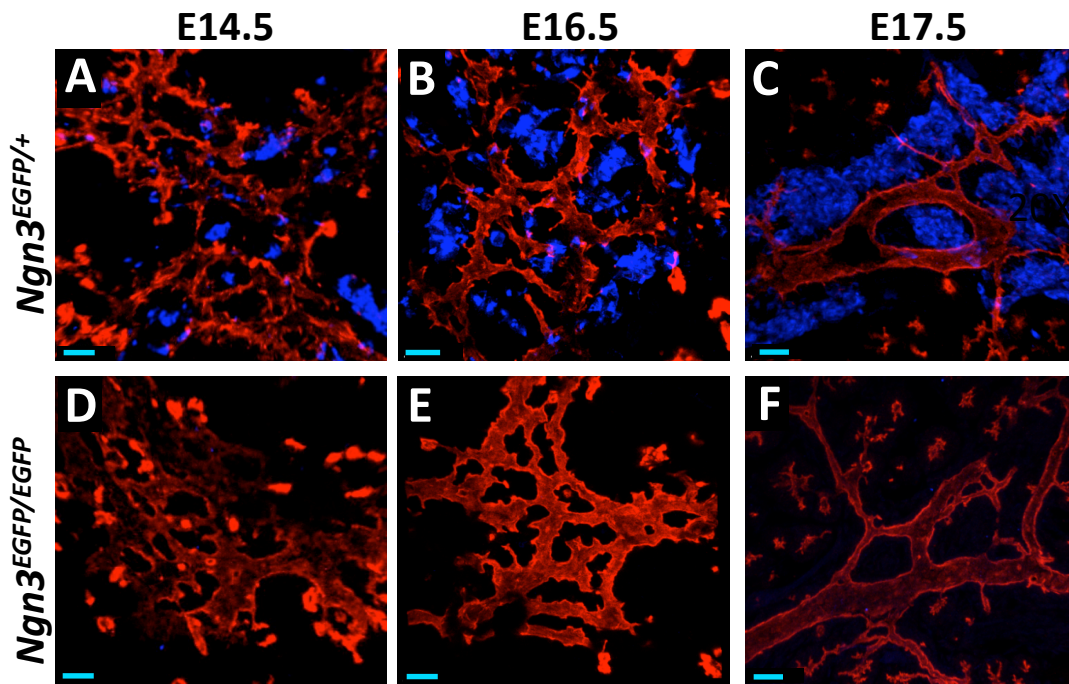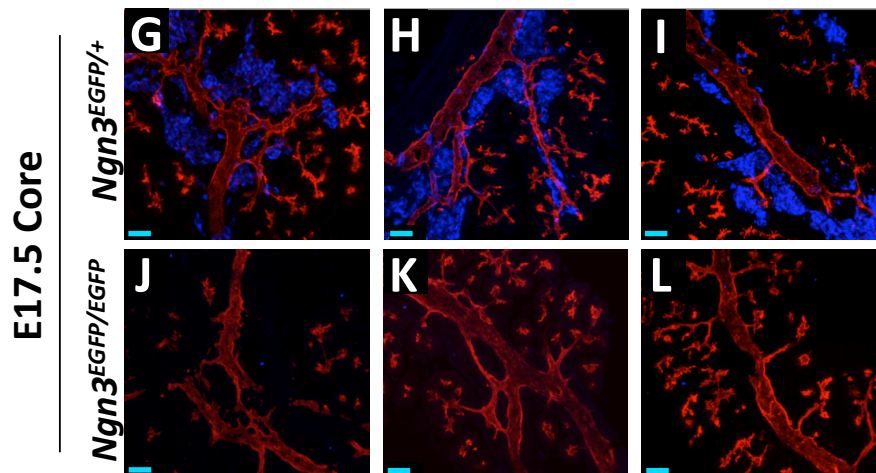

## Periphery

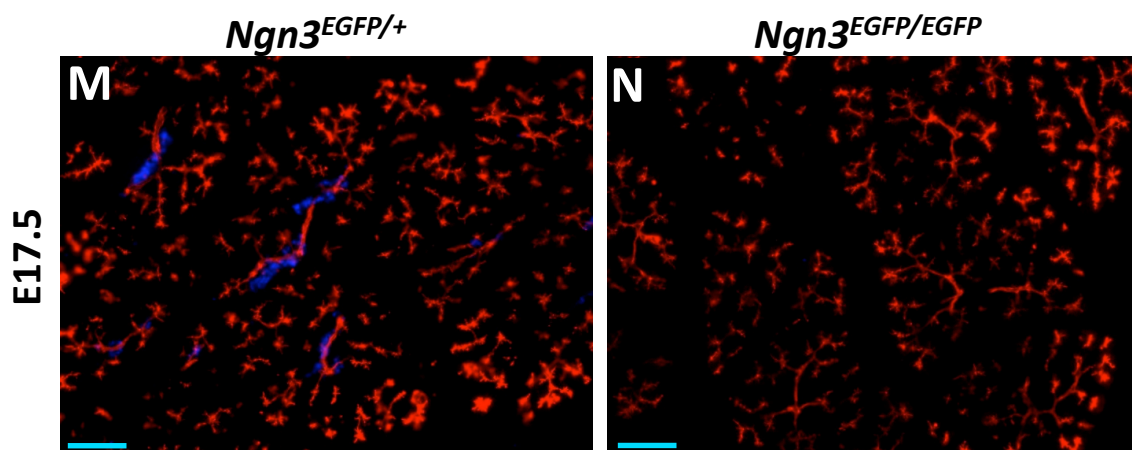



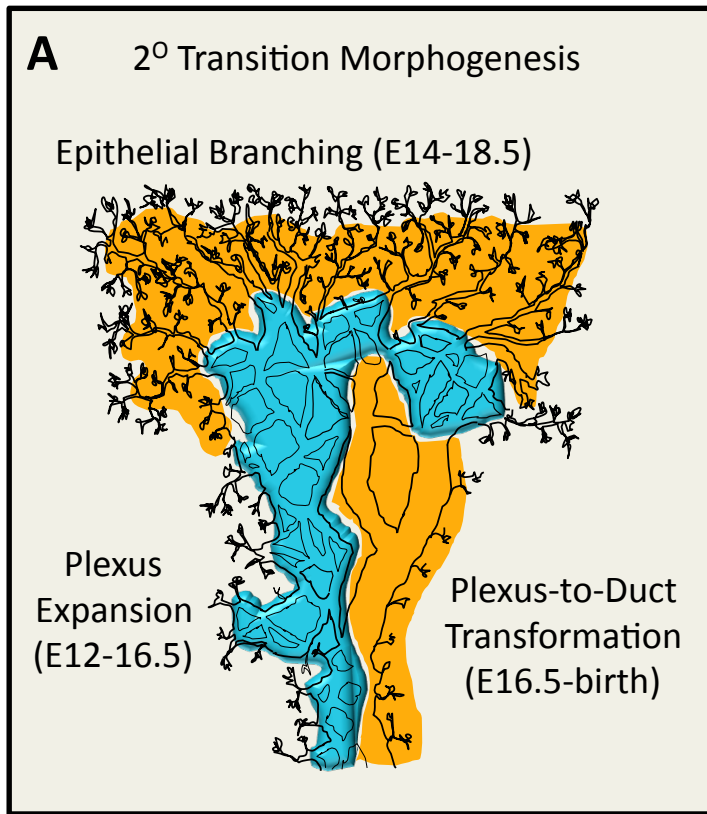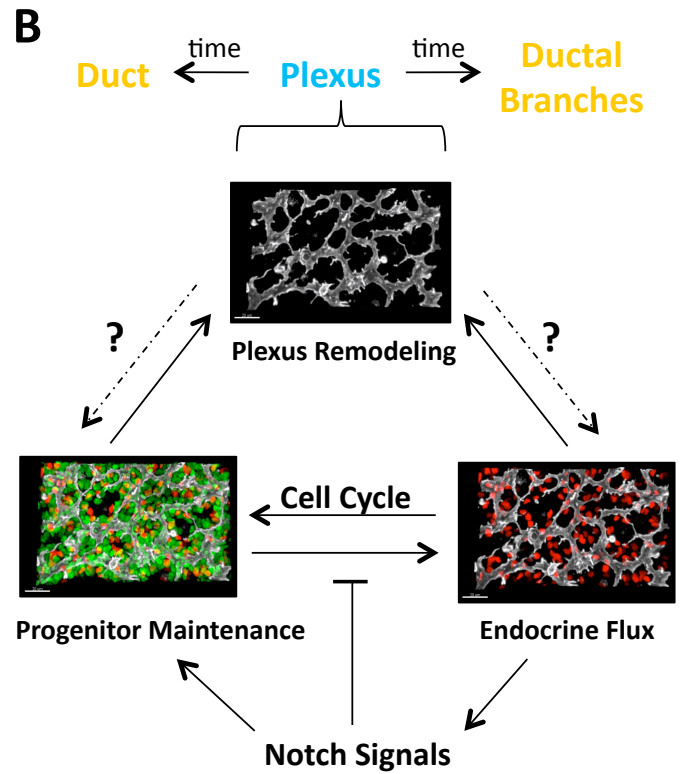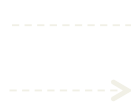

**Bankaitis\_Supp. Table 2**

| Primary Antibodies |                    |                    |                                  |                                        |
|--------------------|--------------------|--------------------|----------------------------------|----------------------------------------|
| Antigen            | Specie             | Dilution           | Label Method                     | Source                                 |
| Muc1               | Hamster            | 1:1000             | IF                               | NeoMarkers                             |
| DBA                | Biotinylated       | 1:400              | Direct                           | Vector Labs                            |
| CK19               | Rabbit             | 1:2000             | IF                               | B. Stanger (U. Penn)                   |
| Sox9               | Rabbit             | 1:5000             | IF                               | Millipore                              |
| Ngn3               | Goat<br>Guinea pig | 1:40,000<br>1:2000 | Biotin amplify<br>Biotin amplify | G. Gu (Vanderbilt)<br>M. Sander (UCSD) |
| EdU                | ----               | ----               | ----                             | Molecular Probes                       |
| Pdx1               | Guinea pig         | 1:1000             | IF                               | C. Wright (Vanderbilt)                 |
| Ecad               | Rat                | 1:1000             | Biotin amplify                   | AbCam                                  |
| Hes1               | Guinea pig         | 1:4000             | Biotin amplify                   | T. Sudo (Toray Industries, Japan)      |
| EYFP               | Rabbit<br>Chicken  | 1:2000<br>1:4000   | IF<br>IF                         | Clonetech<br>Aves                      |
| DAPI               | ----               | ----               | Mount media                      | Life Technologies                      |
| Insulin            | Guinea Pig         | 1:1000             | IF                               | Dako                                   |
| Amylase            | rabbit             | 1:1000             | IF                               | Sigma                                  |

| Antigen                         | Conjugation  | Dilution | Source                    |
|---------------------------------|--------------|----------|---------------------------|
| Guinea pig/Goat/<br>Hamster/Rat | Cy3/Cy5      | 1:500    | Jackson<br>ImmunoResearch |
| Rabbit/Chicken                  | Cy2          | 1:500    | Jackson<br>ImmunoResearch |
| Rabbit/Hamster                  | Cy5          | 1:500    | Jackson<br>ImmunoResearch |
| Goat/Rat                        | Biotinylated | 1:500    | Vector Laboratories       |

**Ngn3EGFP genotyping**

|               |                            |           |
|---------------|----------------------------|-----------|
| <i>ngn3-1</i> | 5'-ATACTCTGGTCCCCCGTG-3'   | Lee, 2002 |
| <i>ngn3-2</i> | 5'-TGTTTGCTGAGTGCCAACTC-3' | Lee, 2002 |
| EGFP          | 5'-GAACTTGTGGCCGTTTACGT-3' | Lee, 2002 |

**GAPDH qPCR**

|          |                            |
|----------|----------------------------|
| GAPDH 1F | 5'-ACTTTGGCATTGTGGAAGG-3'  |
| GAPDH 1R | 5'-GGATGCAGGGATGATGTTCT-3' |

**Hes1 qPCR**

|           |                               |
|-----------|-------------------------------|
| Hes1 RTf  | 5'-TAGCCACCTCTCTCTTCTGA-3'    |
| Hes1 RTTr | 5'-CAGTGCATGGTCAGTCACTTAAT-3' |

**Sox9 qPCR**

|              |                              |
|--------------|------------------------------|
| Sox9 RT2 for | 5'-CTCCCCCTTTTCTTTGTTGTTT-3' |
| Sox9 RT2 rev | 5'-TCTGAAACCTCTCATTGTCCA-3'  |
